1        **Chromatin state transition underlies the temporal changes in gene**  
2                                    **expression during cardiomyocyte maturation**

3

4    Chia-Yeh Lin<sup>1</sup>, Yao-Ming Chang<sup>2</sup>, Hsin-Yi Tseng<sup>1</sup>, Yen-Ling Shih<sup>2</sup>, Hsiao-Hui Yeh<sup>2</sup>,  
5    Po-Li Chen<sup>1</sup>, Chien-Chang Chen<sup>2</sup>, Yu-Ting Yan<sup>2,\*</sup> and Cheng-Fu Kao<sup>1,\*</sup>

6

7

8    1. Institute of Cellular and Organismic Biology, Academia Sinica, 128, Academia  
9    Road, Section 2, Nankang, Taipei, Taiwan.

10    2. Institute of Biomedical Sciences, Academia Sinica, 128, Academia Road, Section  
11    2, Nankang, Taipei, Taiwan.

12

13    \* Corresponding author: [ckao@gate.sinica.edu.tw](mailto:ckao@gate.sinica.edu.tw) and [yyan@ibms.sinica.edu.tw](mailto:yyan@ibms.sinica.edu.tw)

14

15

16

17

18

19

20

21

22

23

24

25

26

27

28 **Abstract**

29 Congenital heart disease (CHD) is often rooted in aberrant gene expression during  
30 heart development. As cells commit to a specific lineage during development,  
31 chromatin dynamics and developmental plasticity generally become more limited.  
32 However, it remains unclear how differentiated cardiomyocytes (CMs) undergo  
33 morphological and functional adaptations to the postnatal environment during the  
34 process of CM maturation. We sought to investigate the regulatory mechanisms that  
35 control postnatal cardiac gene networks. A time-series transcriptomic analysis of  
36 postnatal hearts revealed an integrated, time-ordered transcriptional network that  
37 regulates CM maturation. Remarkably, depletion of histone H2B ubiquitin ligase  
38 RNF20 after formation of the four-chamber heart disrupted these highly coordinated  
39 gene networks. As such, its ablation caused early-onset cardiomyopathy, a phenotype  
40 reminiscent of CHD. Furthermore, the dynamic modulation of chromatin accessibility  
41 by RNF20 during CM maturation was necessary for the operative binding of cardiac  
42 transcription factors that drive transcriptional gene networks. Together, our results  
43 reveal how epigenetic-mediated chromatin state transitions modulate time-ordered gene  
44 expression for CM maturation.

45

46

47 Key words: RNF20, chromatin accessibility, postnatal gene networks, CM maturation

48

## 49 **Introduction**

50 Aberrant cellular specification during cardiogenesis may lead to congenital heart  
51 disease (CHD)<sup>1</sup>, the most common birth defect worldwide<sup>2</sup>, or it may lead to heart  
52 failure, a leading cause of morbidity and mortality in adult life<sup>3</sup>. Since precise control  
53 of gene expression is critical for heart development and maturation<sup>4,5</sup>, knowledge of the  
54 regulatory mechanisms controlling cardiac gene networks is key to understanding the  
55 pathogenesis of cardiovascular disease.

56 Gene expression is tightly controlled by transcription factors (TFs) that act in  
57 accordance with epigenetic regulatory mechanisms<sup>6,7</sup>. TFs bind to specific sequences  
58 of DNA adjacent to a gene promoter and control its activity<sup>6</sup>. However, most TFs  
59 cannot access closed chromatin, and their binding to DNA relies on the presence of a  
60 permissive chromatin environment constructed by epigenetic modulators<sup>7,8</sup>. In heart  
61 development, epigenetic marks are established early at the embryonic stage<sup>9,10</sup>, and  
62 dynamic changes in these marks are associated with cardiac lineage specification and  
63 stage transition<sup>10-12</sup>.

64 An increasingly large body of clinical and experimental research indicates that  
65 aberrant epigenetic regulation can contribute to CHD<sup>9,13</sup>. For instance, alterations in  
66 histone modifying enzymes were shown to commonly occur as *de novo* mutations in  
67 CHD patients<sup>13</sup>. Furthermore, extensive studies have been conducted on the  
68 mechanisms by which H3K4 and H3K27 methylations impact heart development<sup>11,14,15</sup>.  
69 More recently, a critical role for histone H2B ubiquitylation (H2Bub) was demonstrated  
70 in cardiac development<sup>16,17</sup>. Knockdown of the *Xenopus* H2Bub E3 ligases, *rnf20* (Ring  
71 finger protein 20) and *rnf40* (Ring finger protein 40)<sup>18</sup>, beginning at the two-cell stage,  
72 influences cardiac looping and left-right (LR) asymmetry during early embryonic  
73 development<sup>16</sup>. Furthermore, the results of an *in vivo* CRISPR/Cas9 genetic screen  
74 suggested that RNF20/40 is involved in cardiomyocyte (CM) maturation via H2Bub  
75 deposition<sup>17</sup>. Thus, RNF20 appears to be relevant to both CHD and CM maturation<sup>16,19</sup>.  
76 Nevertheless, the molecular function of RNF20 during temporal development of  
77 mammalian heart remains uncharacterized.

78 Dynamic regulation of the RNF20-H2Bub pathway has been linked to embryonic  
79 stem cell differentiation<sup>20-22</sup>. The addition of a single ubiquitin on H2B disrupts the  
80 local and higher-order structures of compacted chromatin<sup>23,24</sup>. This modulation of  
81 chromatin structure affects gene activities, as RNF20-H2Bub promotes the binding of  
82 TFs or regulatory proteins at gene promoters during transcription<sup>25,26</sup>. H2Bub is also

83 selectively enriched at the coding region of highly expressed genes<sup>27</sup>, where its tight  
84 coupling with RNA polymerase II (Pol II)<sup>25,28</sup> and histone chaperone FACT<sup>29</sup> facilitate  
85 transcriptional elongation.

86

## 87 **Results**

### 88 **A time-ordered transcriptional cascade during cardiomyocyte maturation**

89 In postnatal hearts, numerous processes (cell cycle, structural, functional and  
90 metabolic transitions) are required to drive CM maturation<sup>4,5</sup>. These transitional  
91 processes are known to be coordinated by certain gene networks<sup>5,30</sup>, but it remains  
92 unclear whether the transcriptional programs governing each process are regulated  
93 independently and simultaneously or by an integrated time-ordered gene network<sup>4</sup>; and  
94 how epigenetic mechanism might contribute to these processes. To address these open  
95 questions, we conducted two parallel time-series experiments to obtain transcriptomic  
96 data of developing hearts from P2 to P28 from control and mutant hearts of mice with  
97 the conditional ablation of *Rnf20* after cardiac morphogenesis (*Rnf20<sup>lox/flox</sup>; Mck-Cre*;  
98 hereafter called *cKO*) (**Figure 1A**). We found clearly distinctive expression profiles  
99 between all control and *cKO* pairs during CM maturation (PCA analysis, blue and red  
100 circles in **Figure 1B**).

101 We applied the time-ordered gene coexpression network (TO-GCN) method<sup>31</sup> to  
102 elucidate the dynamic of developmental processes over time in control and *cKO* hearts  
103 separately (**Figure S1**). In the analysis of control hearts, each expressed TF within the  
104 time series of transcriptomes was assigned to one of nine levels (L1 to L9) represented  
105 its expression time order over the five time-points (high expression levels are indicated  
106 by red squares in **Figure 1C and Supplementary file 1**). In the network, TFs shown at  
107 the same level indicates that they are upregulated at the same time period. Moreover,  
108 TFs displayed at consecutive levels indicates that they are upregulated in similar time  
109 orders, while TFs at lower-level are up-regulated earlier than TFs at higher-level  
110 (**Figure 1C**).

111 Next, we identified overrepresented functional pathways of control heart  
112 development at each level of TO-GCN by checking the corresponding coexpressed  
113 genes (**Figure 1D and Figure S1-2**). The result shows a clear time-ordered  
114 organization of transcriptional cascades to regulate CM maturation (Left panel, **Figure**  
115 **1D**). For example, hypoxia-inducible factor 1 (HIF1) signaling was enriched at level 1  
116 (L1) and quickly decreased after L2 (Left panel, **Figure 1D and S2-3**), reflecting the

117 transition of hypoxia to normoxia after birth<sup>32</sup>. Following the decrease in HIF1  
118 signaling, most of the enriched pathways from L1 to L5 (corresponding to first week)  
119 were related to cell-cell connection, including genes supporting adherens junctions,  
120 actin cytoskeleton, tight junction focal adhesion, and ECM-receptor interaction (Left  
121 panel, **Figure 1D and Figure S2**). Genes related to cell cycle and DNA replication  
122 pathways were activated from L1/L2 (P2) to L4 (P7), reflecting a state of hyperplasia  
123 during the first week after birth<sup>33</sup> (Left panel, **Figure 1D**). The thyroid (T3) hormone  
124 signaling (Left panel, **Figure 1D**), required for CM growth and structural maturation<sup>34</sup>,  
125 were enriched from L2 to L4. In addition to the upregulation of T3 signaling, we also  
126 observed sequential activation of several other signaling pathways. ErbB signaling was  
127 first activated at L2, followed by neurotrophin and PI3K-AKT signaling at L3, insulin  
128 signaling at L4 and MAPK signaling at L5 (Left panel, **Figure 1D**). The combination  
129 of ErbB and insulin signaling are thought to promote sarcomere synthesis<sup>35,36</sup>. Notably,  
130 cross-talk between T3 and PI3K-AKT is important for myosin heavy chain and titin  
131 isoform transitions and is critical for myocardial distensibility and mechanosignaling  
132<sup>37</sup>. Furthermore, the induction of neurotrophin signaling is required for  
133 neurodevelopment and enhances normal CM Ca<sup>2+</sup> cycling and contraction<sup>38</sup>. These  
134 enriched signaling pathways reflect cardiomyocytes undergoing structural and  
135 functional maturation (indicated by hypertrophy, isoform switch and contraction),  
136 accompanied by halting of the cell-cycle. The activated insulin signaling at L4 is  
137 important for the following fatty acid metabolism and oxidative phosphorylation at L7,  
138 reflecting a metabolism transformation in cardiomyocytes<sup>39</sup>. At the same time, genes  
139 involved in mitochondria biogenesis and organization were highly expressed (**Figure**  
140 **S2**), consistent with idea that maturing CMs undergo a transition of primary energy  
141 source from glucose to fatty acids<sup>40</sup>. Lastly, the pathway of cardiac muscle contraction  
142 was enhanced at L8 (P21) (Left panel, **Figure 1D and Figure S2**), in line with enhanced  
143 heart function at this stage. In summary, the analysis revealed an integrated, time-  
144 ordered transcriptional network that accurately reflects the known coordination of  
145 signaling cascades regulating CM maturation in the first three weeks of life.

146

#### 147 **Coordinated gene networks is critical for postnatal CM development**

148 Compared to the results in control hearts, we observed drastically different  
149 transcriptional regulatory cascades in *cKO* hearts (**Figure 1D and S3**). The disturbance  
150 by *Rnf20* deletion could be observed as early as at L1 (corresponding to P2). For

151 example, the HIF-1 signaling pathway were enriched at L1 and L9 in control and *cKO*  
152 hearts, respectively. Intriguingly, the most dramatically dysregulated pathways at L1 in  
153 *cKO* hearts are related to actin cytoskeleton, tight junctions and adherens junctions,  
154 which contribute to myocyte-myocyte communication<sup>41</sup> and regulate cell shape  
155 (**Figure 1D** and **Figure S2**). In addition, delay of ErbB signaling and disruptions in  
156 many metabolic networks (i.e., inactivation of fructose/mannose, propanoate and 2-  
157 oxocarboxylic acid metabolism, and the early activation of fatty acid metabolism) were  
158 also observed in *cKO* (**Figure 1D**). These disruptions were reflected by the inactivation  
159 of genes involved in mitochondria biogenesis (**Figure S2**). Thus, RNF20 is critical for  
160 the coordination of gene networks during CM maturation, as early as the initial  
161 postnatal response to the hypoxia-to-normoxia shift.

162

### 163 **Ablation of *Rnf20* after chamber formation leads to dilated cardiomyopathy**

164 *Mck-Cre* ablated *Rnf20* in cardiac and skeletal muscle cells at E13.5<sup>42</sup> (**Figure 2A**  
165 **and S4**). The ablation of *Rnf20* by *Mck-Cre* did not affect the Mendelian ratio of each  
166 genotype at postnatal day 1 (P1) (**Table S1**). However, compared to other littermates,  
167 *cKO* mice showed significantly lower body weight and sudden death beginning at P35  
168 (**Figure 2B** and **2C**). Strikingly, all *cKO* mice died within 8 weeks (P56) of birth  
169 (**Figure 2C**). At birth, both the control (*flox/flox*) and *cKO* mice had hearts with normal  
170 structures, and as expected, the cardiac sizes increased with time (**Figure 2D**). However,  
171 the *cKO* hearts developed a pronounced ventricular chamber dilation after P28 (**Figure**  
172 **2D**). Echocardiographic analysis revealed that the left ventricle (LV) systolic function,  
173 as measured by fractional shortening (FS) and ejection fraction (EF), was significantly  
174 impaired after P28 (**Figure 2E**). We also detected abnormal electrocardiogram (ECG)  
175 patterns in *cKO* mice beginning at P14 (**Figure 2F**). The depolarization and  
176 repolarization of the *cKO* ventricles were disturbed, exhibiting prolonged QRS  
177 complex and QT interval (**Figure 2F**). ECG also revealed that the *cKO* mice developed  
178 irregular heartbeat at P28 (**Figure S5**). Thus, the *cKO* mice appear to suffer from dilated  
179 cardiomyopathy<sup>43</sup> and arrhythmia, which may cause their sudden death.

180 Notably, deletion of *Rnf20* before chamber formation is embryonic lethal as no  
181 liveborn *Rnf20<sup>flox/flox</sup>*; *Mesp1-Cre* mice were recovered (**Table S2**), and the mutant  
182 embryos displayed a heart looping defect at E9.5, growth retardation at E10.5 and were  
183 absorbed before E12.5 (**Figure 2A** and **S6**). *Mesp1-Cre* is activated at embryonic day  
184 6.5 (E6.5)<sup>44</sup>; thus, the lack of RNF20 before chamber formation (E10-13.5 in mice)

185 prevents proper heart morphogenesis. Furthermore, these cardiac defects were not  
186 general effects of myopathy since mice with muscle-specific knockout of *Rnf20*  
187 (*Rnf20<sup>lox/flox</sup>; Hsa-Cre*)<sup>45</sup> exhibited identical growth curves, survival rates, heart  
188 morphologies and cardiac functions to control mice at P49 (**Figure S7**). Taken together,  
189 these findings lead us to conclude that RNF20-mediated transcriptional network is  
190 essential for postnatal cardiac development and function.

191

## 192 **Structural, functional and metabolic transitions in postnatal heart**

193 Since the results up to this point implied that lack of RNF20 may disrupt multiple  
194 processes in CM maturation, we sought to analyze the biological outcomes of *Rnf20*  
195 *cKO* in mouse heart. We first tested whether the loss of RNF20 affects the polarization  
196 of intercalated discs (IDs), a hallmark of structural maturation of CM<sup>5,30</sup> (**Figure 3A**).  
197 The major components of IDs include N-cadherin (an adherens junction protein),  
198 connexin 43 (a gap junction protein) and desmoplakin (a cytoplasmic desmosomal  
199 protein). These components were circumferentially distributed at P2 and gradually  
200 became polarized (P21), migrating to the ends of the cardiomyocytes at P35 in the  
201 control hearts (**Figure 3B and S8A-B**). In contrast, the migration was completely  
202 abolished in the CMs of *cKO* mice. Next, we characterized the ultrastructure changes  
203 in IDs during CM maturation using transmission electron microscopy (TEM). IDs were  
204 visible and adjacent to the intercellular space between myocytes in the control  
205 cardiomyocytes at P21 and P35, with clear adherent junctions (white arrow in **Figure**  
206 **3C**) and desmosomes (yellow arrow in **Figure 3C**). By contrast, the structures of IDs  
207 in mutant hearts were fragmented and disorganized (P21). By P35, the IDs were even  
208 degenerated with widened gaps.

209 The structural maturation of cardiomyocytes (**Figure 3D**) may also be assessed by  
210 the localization of vinculin, a membrane-cytoskeletal protein controlling cytoskeletal  
211 mechanics and cell shape<sup>46</sup> (**Figure 3E**). In the control mouse myocardium,  
212 cytoplasmic vinculin migrated to the cell membrane during maturation (upper panel,  
213 **Figure 3E**); however, the majority of vinculin remained in the cytoplasmic region in  
214 RNF20-depleted mutants (lower panel, **Figure 3E**). Furthermore, we found that the  
215 cardiomyocytes in *cKO* mice failed to adopt a rectangular shape at P35 (**Figure 3E and**  
216 **S8C**). Since CM cell shape is intimately linked to sarcomere alignment<sup>47</sup>, we also  
217 inspected the myofibril organization in postnatal hearts by TEM (**Figure 3F**). In  
218 contrast to the control group, the myofibril alignment in cardiomyocytes of *cKO* was

219 distorted, exhibiting loose actin filaments (yellow arrow in **Figure 3F**) and fuzzy Z-  
220 lines (white arrowhead in **Figure 3F**); the M-line was also difficult to distinguish  
221 (yellow arrowhead in **Figure 3F**).

222 Last, we examined the effects of *Rnf20 cKO* on CM metabolic maturation, as  
223 indicated by the maturation of mitochondria (**Figure 3G**)<sup>4,5</sup>. Control hearts showed a  
224 gradual morphological shift from small, tubular and round mitochondria to large, ovoid,  
225 well-organized organelles between P7 and P35 (**Figure 3H and S8D**), which is typical  
226 of developing hearts<sup>30</sup>. However, this morphological maturation did not occur in  
227 mitochondria of *cKO* hearts (**Figure 3H and S8D**). We next analyzed the arrangement  
228 and density of cristae by TEM. Interestingly, the arrangement of cristae was not altered  
229 in *cKO* mutants. However, a breakdown of both inner and outer membrane was  
230 observed at postnatal day 35 (*cKO* in **Figure 3H**). Furthermore, mitochondria cristae  
231 density (an indicator of mitochondria function)<sup>5</sup> was low from P21 onwards in *cKO*  
232 hearts (**Figure 3H**). The mitochondria DNA (mtDNA) copy number was reduced by  
233 20% at P35 in *cKO* mice (**Figure S7E**). In addition, the protein levels of major electron  
234 transport chain components, cytochrome c oxidase and COX VI were markedly  
235 decreased in mutant heart (**Figure 3I**). The observed low enzyme activities of  
236 cytochrome c oxidase (**Figure 3J**) and NADH oxidase (**Figure 3K**)<sup>48</sup> were likely  
237 responsible for the drastic reduction of ATP in *cKO* myocardium (**Figure 3L**).  
238 Collectively, these data suggested that RNF20 extensively regulates CM maturation by  
239 orchestrating gene networks and their functional outcomes.

240

### 241 **The dynamic chromatin opening during CM maturation**

242 Since RNF20 is known to be an epigenetic factor that modulates chromatin  
243 compaction via monoubiquitylating histone H2B<sup>23</sup>, we wondered whether Rnf20-  
244 mediated epigenetic landscaping is involved in regulating the transcriptional networks  
245 during postnatal CM development (**Figure 1D**). To this end, we profiled the chromatin  
246 accessibility by ATAC-seq<sup>49</sup> in postnatal hearts of two time points, P7 and P21 (**Figure**  
247 **4A**), which represented the early and late stages, respectively, of the postnatal  
248 transcriptional maturation programs. In control hearts, we found the number of wide-  
249 spread accessible regions (peaks) reduced by almost 50% at P21 against P7 (**Figure**  
250 **4B**). Most of reduced peaks were from promoter regions (from 13,320 to 3,714 peaks;  
251 reduction of 72.1%; **Figure 4B and supplementary file 2**). Intriguingly, this dynamic  
252 change in chromatin accessibility was positively correlated to the level of RNF20 in



253 control hearts (**Figure 4C**), suggesting that the chromatin in early and late stages  
254 displayed distinctive epigenetic landscapes.

255 On the other hand, we found only about a half of peaks were detected in the  
256 genome of P7 in *cKO* hearts. Compared to P7 of control, number of detected peaks  
257 decreased in all genomic regions but predominantly in promoter regions (from 13,320  
258 to 5,567 peaks; reduction of 58.2%; **Figure 4B**). These results suggest that RNF20  
259 facilitates chromatin accessibility, especially during the early stage of postnatal heart  
260 development.

261

### 262 **Promoter-opening is required for postnatal gene expression**

263 Since the loss of *Rnf20* primarily impacted accessibility at gene promoters and  
264 nucleosome eviction at gene promoter is one of the major events during transcriptional  
265 activation<sup>50</sup>, we postulated that RNF20-mediated chromatin opening may affect  
266 postnatal transcriptional regulation. To test this hypothesis, we identified genes with  
267 ATAC-seq peaks within 3Kb of the transcription starting sites (TSS) (**Figure 4D**). A  
268 large number of peak-associated genes (11,543 genes) was identified in the control  
269 hearts at P7, while only 6,425 genes were associated with accessible promoters in P7  
270 *cKO* hearts (**Figure 4D**). This indicated that almost fifty percent (49.5%; 5,713) of  
271 active genes in the P7 heart may require RNF20 for their promoter opening; such genes  
272 are hereafter called “RNF20-open” genes (**Figure 4D**). KEGG pathway enrichment  
273 analysis shows that “RNF20-open” genes were enriched in pathways related to CM  
274 maturation, such as calcium signaling, cell cycle, fatty acid metabolism, gap junction,  
275 and thyroid hormone synthesis<sup>4,5</sup> (**Figure S10**). Only a small fraction of genes (595  
276 genes) was classified as “*cKO*-open” genes (**Figure 4D**), indicating their promoters  
277 were accessible under RNF20 depletion. These genes showed no apparent functional  
278 links with heart development (**Figure S10**). These findings revealed that RNF20-  
279 mediated chromatin opening at P7 regulates transcriptional programs in CM maturation  
280 and thus may play a critical role in coordinating postnatal gene networks.

281 At P21, the number of peak-associated genes in the control hearts was comparable  
282 to that in the *cKO* hearts (5,288 in the control and 5,108 in *cKO*). However, the genes  
283 in these two groups overlapped by only about 50% (**Figure 4D**), and there were roughly  
284 equal numbers of “RNF20-open” (2646) and “*cKO*-open” (2466) genes. Of note, the  
285 “RNF20-open” genes were involved in metabolism-related pathways, such as pyruvate  
286 metabolism, glucagon signaling, regulation of lipolysis in adipocytes (**Figure S11**).

287 These RNF20-associated pathways mostly correlated with enriched functions at the  
288 later stages of CM maturation (**Figure 1D and S3**). In contrast, the “*cKO*-open” genes  
289 were enriched in Wnt signaling pathway, ECM-receptor interaction and neurotrophin  
290 signaling (**Figure S11**), which were highly expressed at the neonatal phase (P2 to P7)  
291 (**Figure 1D**). Thus, the ablation of *Rnf20* causes the transcriptional program of P21  
292 heart to retain similarity with the initial postnatal stage and impairs CM maturation.

293

### 294 **Chromatin remodeling facilitates dynamic binding of TFs during postnatal heart** 295 **development**

296 Previous studies reported that gene network transitions during heart development  
297 are tightly controlled by TFs<sup>51</sup>, we were wondering whether RNF20-mediated changes  
298 in chromatin accessibility affect the binding of TFs to modulate postnatal heart  
299 development. To this end, we used a computational tool, TOBIAS<sup>52</sup> to perform a TF  
300 footprint analysis with the ATAC-seq data (**Figure 4E**). In the result, differential  
301 binding scores (DBSs) of 746 TFs represent their relative binding efficiency between  
302 the control and *cKO* groups (**Figure 4F**; a full list of analyzed TFs can be found in  
303 **Supplementary file 3**). For P7, we identified 199 RNF20-dependent and 39 *cKO*-  
304 dependent TFs by their binding activity ( $-\log_{10}p\text{-value} > 100$ ) in the control (DBS  $>$   
305 0.25) and *cKO* (DBS  $< -0.25$ ) groups, respectively (**Figure 4F and supplementary file**  
306 **3**). Gene Ontology (GO) enrichment analysis shows that the RNF20-dependent TFs  
307 were involved in cardiac development and CM maturation (**Figure 4F and S12A**).  
308 Remarkably, many of the RNF20-dependent TFs at P7 turned to be *cKO*-dependent  
309 (DBS  $< 0$ ) at P21 (**Figure 4F**), which is in line with the chromatin opening profile in  
310 the *cKO* hearts (p21 in **Figure 4D**). These results provide further explanation for the  
311 extensive transcriptional dysregulation caused by deletion of *Rnf20* (**Figure 2D**).  
312 Conversely, the binding patterns of the 39 *cKO*-dependent TFs became sparsely  
313 distributed, and their functional categories were unrelated to heart  
314 development/function (**Figure 4F and S12B**). Taken together, these observations  
315 suggest that the elevated levels of RNF20 at the early stage (P7) of CM maturation are  
316 necessary for proper binding of cardiac TFs that drive transcriptional gene networks,  
317 and the continual expression of RNF20 at lower levels is required to sustain gene-  
318 network transitions (**Figure 4G**). Thus, RNF20 is centrally involved in establishing a  
319 dynamic epigenetic environment that facilitates the execution of time-ordered gene  
320 networks during postnatal heart development (**Figure 1D**).

321

## 322 **Pioneer factors contribute to chromatin opening**

323 Of note, almost 50% of genes in the control hearts of P7 (50.5%, 5830 genes) and  
324 P21 (46.44%, 2642 genes) did not require RNF20 for promoter opening (**Figure 4D**):  
325 defined as “persistent-open” genes. The products of “persistent-open” genes included  
326 the regulatory factors that are essential for CM maturation, such as HIF-1 signaling,  
327 ErbB signaling pathway and tight junction (**Figure 1D, S10 and S11**), suggesting there  
328 must be other factors required to maintain the basal level of chromatin opening which  
329 governs these maturation functions. It is interesting that many pioneer factors, including  
330 GATA families (GATA4, GATA6) and forkhead box families (FOXA1, FOXA2)  
331 (yellow dots in **Figure 4F**), did not rely on RNF20 for recognition site binding [low  
332 Dbs (x-axis) and low p-value (y-axis); **Supplementary file 3**]. Pioneer factors are able  
333 to open closed chromatin sites in order to implement cell fate programs<sup>53</sup>. Consistent  
334 with their pioneering roles during embryonic heart development<sup>54,55</sup>, expression levels  
335 of GATA4 and GATA6 were high at early postnatal stages (L1-L2 by TO-GCN  
336 analysis, **Figure 2C**). Thus, the promoter accessibilities of “persistent-open” genes are  
337 likely attributable to the cooperation of pioneer factors via RNF20-independent  
338 mechanisms. Intriguingly, the time-ordered expression of some “persistent-open” genes  
339 were disrupted in the absence of RNF20 (**Figure 1D, S10 and S11**). As such, RNF20  
340 may also regulate the optimal expression of “persistent-open” genes in postnatal heart  
341 without affecting the chromatin accessibility at their promoters.

342

## 343 **Discussion**

344 In this study, we found that RNF20-dependent modulation of dynamic chromatin  
345 accessibility is required for the time-ordered transcription of postnatal genes and CM  
346 maturation. Our analyses demonstrated that the epigenetic factor, RNF20 is essential  
347 for heart specification and morphogenesis at early stages; then, it is also required for  
348 CM adaptation to body size and workload during postnatal growth (**Figure 5A**). We  
349 further identified a transcriptional regulatory cascade that orchestrates the sequential  
350 structural, cell-cycle, functional and metabolic maturation programs in the postnatal  
351 heart (**Figure 5B**). Evidence from our study suggests that RNF20 plays a key role in  
352 regulating the time-ordered gene networks during postnatal CM maturation by  
353 modulating chromatin accessibility. Mechanistically, RNF20-mediated chromatin  
354 opening in the early postnatal heart globally resolves epigenetic barriers to allow the

355 maturation program to proceed. The decrease of RNF20 expression at the end-stage of  
356 maturation then reestablishes a more compact epigenetic state with less transcriptional  
357 flexibility, which is required for the mature cells. RNF20 is likely to modulate  
358 chromatin accessibility through its epigenetic target, H2Bub<sup>29</sup>, as this modification has  
359 been shown to disrupt local and higher-order chromatin compaction *in vitro* and *in vivo*  
360<sup>23,24</sup>. However, our data do not exclude the possibility that RNF20 may regulate other  
361 epigenetic factors to affect the postnatal chromatin landscape.

362 Global differences in chromatin accessibility have been observed during  
363 development of several different species, such as humans and flies<sup>56,57</sup>. Accessibility  
364 of chromatin may also differ across different life stages, as demonstrated in the  
365 developing and aged *C. elegans*<sup>58</sup>. Stage-specific reorganization of the chromatin  
366 landscape in cells also appears to be critical for lineage-specific gene expression,  
367 highlighting the importance of chromatin accessibility in cell-fate determination<sup>59</sup>. The  
368 dynamics of chromatin accessibility are modulated by the combined effects of  
369 chromatin remodelers<sup>60,61</sup>, TFs<sup>62</sup> and PTMs<sup>63</sup>. However, it remains uncertain how  
370 accessibility of chromatin is modulated in response to external stimuli and  
371 developmental cues. Overwhelming evidence supports the roles of different PTMs in  
372 generating functional chromatin states<sup>64</sup>, and PTMs are known to influence chromatin  
373 accessibility via indirect mechanisms, such as altering TF binding and nucleosome  
374 affinity of chromatin remodelers. Intriguingly, however, uncertainty remains about how  
375 PTMs may directly contribute to accessibility remodeling of chromatin templates. Our  
376 finding that RNF20 helps to establish a dynamic chromatin environment for CM  
377 maturation has some intriguing implications. First, the deletion of *Rnf20* after cardiac  
378 morphogenesis does not change cell fates or identity during prenatal or neonatal heart  
379 development, but it dramatically compromises CM maturation. At the molecular level,  
380 we found that RNF20 influences chromatin opening in nearly half of the gene promoters  
381 involved in CM maturation, suggesting that there is a division of labor for modulating  
382 chromatin accessibility. The cardiac-specific pioneer factors most likely specialize in  
383 modulating the chromatin states in those parts of the genome required for cardiac cell  
384 fate. In contrast, RNF20 (possibly via H2Bub) may promote chromatin plasticity in the  
385 rest of genome, allowing the heart cells to undergo remodeling from a fetal to an adult  
386 state without affecting core cell identity factors. Thus, our findings suggest a novel  
387 mechanism in which PTMs directly and extensively modulate chromatin accessibility  
388 dynamics to orchestrate developmental processes.

389 The mechanisms of regulating and coordinating constituent processes during CM  
390 maturation have received increasing attention because it is not yet possible to achieve  
391 complete maturation of pluripotent stem cell (PSC)-induced CMs (iPSC-CMs)<sup>4</sup>. Our  
392 TO-GCN analysis revealed that postnatal heart development is initiated by integrated  
393 signals, including transient expression of hypoxia-inducible factor 1-alpha (HIF-1 $\alpha$ ),  
394 cell-cell connection (adherens and tight junction) and structural organization  
395 (regulation of actin cytoskeleton). Thus, the coordinated activation of these pathways  
396 may help initiate CM maturation. In support of this idea, the synergistic application of  
397 electrical/mechanical stimulation, extracellular matrix and non-CM co-cultures can  
398 facilitate iPSC-CMs maturation<sup>30,65</sup>. Furthermore, the inhibition of HIF1 $\alpha$  enhances the  
399 contractile, electrophysiologic and metabolic maturation of iPSC-CMs<sup>66,67</sup>. The  
400 maturation of CMs involves a complex transcriptional network coordinated by cardiac  
401 and non-cardiac cells<sup>30,41,68-70</sup>. Our study provides clear staging information and  
402 delineation of transcriptionally active maturation processes based on analyses of whole  
403 heart transcriptomes using a comparative transcriptomic method<sup>31</sup>. Thus, our approach  
404 may serve to identify the complete set of processes underlying CM maturation.  
405 Furthermore, our mouse genetic results imply that RNF20 mutations may cause CHD,  
406 as supported by previous observations in CHD patients and in *Xenopus*<sup>13,16</sup>. The results  
407 further suggest that functional RNF20 abnormalities beginning at late-gestation periods  
408 could be related to early-onset cardiomyopathy in children and young adults, even  
409 without observable effects on heart morphogenesis.

410 In summary, our findings demonstrate that dynamic chromatin accessibility is  
411 critical for the time-ordered expression of postnatal genes during CM maturation, and  
412 the epigenetic factor RNF20 plays a decisive role in mediating postnatal chromatin  
413 accessibility remodeling. We also offer a complete roadmap of gene cascades that direct  
414 CM maturation, providing insights that may improve therapies for CHD and facilitate  
415 the development of iPSC-CMs to treat heart disease.

416

## 417 **Acknowledgments**

418 The authors thank Dr. Ting-Fen Tsai for constructive comments during manuscript  
419 preparation. We are grateful to the staff at the Core Facility of the Institute of Cellular  
420 and Organismic Biology, Academia Sinica, for EM service and confocal assistance; the  
421 Transgenic Core Facility of the Institute of Molecular Biology, Academia Sinica, for

422 transgenic mice production and Genomics core facility of the Institute of Molecular  
423 Biology, Academia Sinica, for NGS service. The authors also thank the Taiwan Mouse  
424 Clinic, Academia Sinica, and Taiwan Animal Consortium for the technical support  
425 in electrocardiography and high-frequency ultrasound, and Dr. Marcus Calkins for  
426 English editing. This work was supported by the intramural funding of the Institute of  
427 Cellular and Organismic Biology, Academia Sinica, and by grants from the Ministry of  
428 Science and Technology, Taiwan (MOST 109-2320-B-001-017-MY3).

## 429 **Supplementary information**

430 Experimental designs, materials, additional information and references are available  
431 in the supplemented files.

## 432 **References**

- 433 1 Epstein, J. A. Franklin H. Epstein Lecture. Cardiac development and  
434 implications for heart disease. *N Engl J Med* **363**, 1638-1647,  
435 doi:10.1056/NEJMra1003941 (2010).
- 436 2 Hoffman, J. I. & Kaplan, S. The incidence of congenital heart disease. *J Am Coll*  
437 *Cardiol* **39**, 1890-1900, doi:10.1016/s0735-1097(02)01886-7 (2002).
- 438 3 McMurray, J. J. Clinical practice. Systolic heart failure. *N Engl J Med* **362**, 228-  
439 238, doi:10.1056/NEJMcp0909392 (2010).
- 440 4 Kannan, S. & Kwon, C. Regulation of cardiomyocyte maturation during critical  
441 perinatal window. *J Physiol* **598**, 2941-2956, doi:10.1113/JP276754 (2020).
- 442 5 Guo, Y. & Pu, W. T. Cardiomyocyte Maturation: New Phase in Development.  
443 *Circ Res* **126**, 1086-1106, doi:10.1161/CIRCRESAHA.119.315862 (2020).
- 444 6 Latchman, D. S. Transcription factors: an overview. *Int J Biochem Cell Biol* **29**,  
445 1305-1312, doi:10.1016/s1357-2725(97)00085-x (1997).
- 446 7 Liu, L., Jin, G. & Zhou, X. Modeling the relationship of epigenetic  
447 modifications to transcription factor binding. *Nucleic Acids Res* **43**, 3873-3885,  
448 doi:10.1093/nar/gkv255 (2015).
- 449 8 Bannister, A. J. & Kouzarides, T. Regulation of chromatin by histone  
450 modifications. *Cell Res* **21**, 381-395, doi:10.1038/cr.2011.22 (2011).
- 451 9 Jarrell, D. K., Lennon, M. L. & Jacot, J. G. Epigenetics and Mechanobiology in  
452 Heart Development and Congenital Heart Disease. *Diseases* **7**,  
453 doi:10.3390/diseases7030052 (2019).
- 454 10 Paige, S. L. *et al.* A temporal chromatin signature in human embryonic stem  
455 cells identifies regulators of cardiac development. *Cell* **151**, 221-232,  
456 doi:10.1016/j.cell.2012.08.027 (2012).
- 457 11 Wamstad, J. A. *et al.* Dynamic and coordinated epigenetic regulation of  
458 developmental transitions in the cardiac lineage. *Cell* **151**, 206-220,

- 459 doi:10.1016/j.cell.2012.07.035 (2012).
- 460 12 Gilsbach, R. *et al.* Dynamic DNA methylation orchestrates cardiomyocyte  
461 development, maturation and disease. *Nat Commun* **5**, 5288,  
462 doi:10.1038/ncomms6288 (2014).
- 463 13 Zaidi, S. *et al.* De novo mutations in histone-modifying genes in congenital  
464 heart disease. *Nature* **498**, 220-+, doi:10.1038/nature12141 (2013).
- 465 14 Ang, S. Y. *et al.* KMT2D regulates specific programs in heart development via  
466 histone H3 lysine 4 di-methylation. *Development* **143**, 810-821,  
467 doi:10.1242/dev.132688 (2016).
- 468 15 Wan, X. *et al.* Mll2 controls cardiac lineage differentiation of mouse embryonic  
469 stem cells by promoting H3K4me3 deposition at cardiac-specific genes. *Stem*  
470 *Cell Rev Rep* **10**, 643-652, doi:10.1007/s12015-014-9527-y (2014).
- 471 16 Robson, A. *et al.* Histone H2B monoubiquitination regulates heart development  
472 via epigenetic control of cilia motility. *Proc Natl Acad Sci U S A* **116**, 14049-  
473 14054, doi:10.1073/pnas.1808341116 (2019).
- 474 17 VanDusen, N. J. *et al.* Massively parallel in vivo CRISPR screening identifies  
475 RNF20/40 as epigenetic regulators of cardiomyocyte maturation. *Nat Commun*  
476 **12**, 4442, doi:10.1038/s41467-021-24743-z (2021).
- 477 18 Fuchs, G. & Oren, M. Writing and reading H2B monoubiquitylation. *Biochim*  
478 *Biophys Acta* **1839**, 694-701, doi:10.1016/j.bbagr.2014.01.002 (2014).
- 479 19 VanDusen, N. J. *et al.* Massively parallel in vivo CRISPR screening identifies  
480 RNF20/40 as epigenetic regulators of cardiomyocyte maturation. *Nat Commun*  
481 **12**, 4442, doi:10.1038/s41467-021-24743-z (2021).
- 482 20 Chen, S., Li, J., Wang, D. L. & Sun, F. L. Histone H2B lysine 120  
483 monoubiquitination is required for embryonic stem cell differentiation. *Cell Res*  
484 **22**, 1402-1405, doi:10.1038/cr.2012.114 (2012).
- 485 21 Fuchs, G. *et al.* RNF20 and USP44 regulate stem cell differentiation by  
486 modulating H2B monoubiquitylation. *Mol Cell* **46**, 662-673,  
487 doi:10.1016/j.molcel.2012.05.023 (2012).
- 488 22 Karpiuk, O. *et al.* The histone H2B monoubiquitination regulatory pathway is  
489 required for differentiation of multipotent stem cells. *Mol Cell* **46**, 705-713,  
490 doi:10.1016/j.molcel.2012.05.022 (2012).
- 491 23 Fierz, B. *et al.* Histone H2B ubiquitylation disrupts local and higher-order  
492 chromatin compaction. *Nat Chem Biol* **7**, 113-119, doi:10.1038/nchembio.501  
493 (2011).
- 494 24 Moyal, L. *et al.* Requirement of ATM-dependent monoubiquitylation of histone  
495 H2B for timely repair of DNA double-strand breaks. *Mol Cell* **41**, 529-542,  
496 doi:10.1016/j.molcel.2011.02.015 (2011).

- 497 25 Zhang, F. & Yu, X. WAC, a functional partner of RNF20/40, regulates histone  
498 H2B ubiquitination and gene transcription. *Mol Cell* **41**, 384-397,  
499 doi:10.1016/j.molcel.2011.01.024 (2011).
- 500 26 Kim, J., Hake, S. B. & Roeder, R. G. The human homolog of yeast BRE1  
501 functions as a transcriptional coactivator through direct activator interactions.  
502 *Mol Cell* **20**, 759-770, doi:10.1016/j.molcel.2005.11.012 (2005).
- 503 27 Minsky, N. *et al.* Monoubiquitinated H2B is associated with the transcribed  
504 region of highly expressed genes in human cells. *Nat Cell Biol* **10**, 483-488,  
505 doi:10.1038/ncb1712 (2008).
- 506 28 Xiao, T. *et al.* Histone H2B ubiquitylation is associated with elongating RNA  
507 polymerase II. *Mol Cell Biol* **25**, 637-651, doi:10.1128/MCB.25.2.637-  
508 651.2005 (2005).
- 509 29 Pavri, R. *et al.* Histone H2B monoubiquitination functions cooperatively with  
510 FACT to regulate elongation by RNA polymerase II. *Cell* **125**, 703-717,  
511 doi:10.1016/j.cell.2006.04.029 (2006).
- 512 30 Karbassi, E. *et al.* Cardiomyocyte maturation: advances in knowledge and  
513 implications for regenerative medicine. *Nat Rev Cardiol* **17**, 341-359,  
514 doi:10.1038/s41569-019-0331-x (2020).
- 515 31 Chang, Y. M. *et al.* Comparative transcriptomics method to infer gene  
516 coexpression networks and its applications to maize and rice leaf transcriptomes.  
517 *Proceedings of the National Academy of Sciences of the United States of*  
518 *America* **116**, 3091-3099, doi:10.1073/pnas.1817621116 (2019).
- 519 32 Semenza, G. L. Hydroxylation of HIF-1: oxygen sensing at the molecular level.  
520 *Physiology (Bethesda)* **19**, 176-182, doi:10.1152/physiol.00001.2004 (2004).
- 521 33 Porrello, E. R. *et al.* Transient regenerative potential of the neonatal mouse heart.  
522 *Science* **331**, 1078-1080, doi:10.1126/science.1200708 (2011).
- 523 34 Grais, I. M. & Sowers, J. R. Thyroid and the heart. *Am J Med* **127**, 691-698,  
524 doi:10.1016/j.amjmed.2014.03.009 (2014).
- 525 35 Sanchez-Soria, P. & Camenisch, T. D. ErbB signaling in cardiac development  
526 and disease. *Semin Cell Dev Biol* **21**, 929-935,  
527 doi:10.1016/j.semcdb.2010.09.011 (2010).
- 528 36 Bertrand, L., Horman, S., Beauloye, C. & Vanoverschelde, J. L. Insulin  
529 signalling in the heart. *Cardiovasc Res* **79**, 238-248, doi:10.1093/cvr/cvn093  
530 (2008).
- 531 37 Kruger, M. *et al.* Thyroid hormone regulates developmental titin isoform  
532 transitions via the phosphatidylinositol-3-kinase/ AKT pathway. *Circ Res* **102**,  
533 439-447, doi:10.1161/CIRCRESAHA.107.162719 (2008).
- 534 38 Feng, N. *et al.* Constitutive BDNF/TrkB signaling is required for normal cardiac



- 535 contraction and relaxation. *Proc Natl Acad Sci U S A* **112**, 1880-1885,  
536 doi:10.1073/pnas.1417949112 (2015).
- 537 39 Riehle, C. & Abel, E. D. Insulin Signaling and Heart Failure. *Circ Res* **118**,  
538 1151-1169, doi:10.1161/CIRCRESAHA.116.306206 (2016).
- 539 40 Lopaschuk, G. D. & Jaswal, J. S. Energy metabolic phenotype of the  
540 cardiomyocyte during development, differentiation, and postnatal maturation. *J*  
541 *Cardiovasc Pharmacol* **56**, 130-140, doi:10.1097/FJC.0b013e3181e74a14  
542 (2010).
- 543 41 Tirziu, D., Giordano, F. J. & Simons, M. Cell communications in the heart.  
544 *Circulation* **122**, 928-937, doi:10.1161/CIRCULATIONAHA.108.847731  
545 (2010).
- 546 42 Johnson, J. E., Wold, B. J. & Hauschka, S. D. Muscle Creatine-Kinase Sequence  
547 Elements Regulating Skeletal and Cardiac-Muscle Expression in Transgenic  
548 Mice. *Molecular and Cellular Biology* **9**, 3393-3399, doi:Doi  
549 10.1128/Mcb.9.8.3393 (1989).
- 550 43 Japp, A. G., Gulati, A., Cook, S. A., Cowie, M. R. & Prasad, S. K. The Diagnosis  
551 and Evaluation of Dilated Cardiomyopathy. *J Am Coll Cardiol* **67**, 2996-3010,  
552 doi:10.1016/j.jacc.2016.03.590 (2016).
- 553 44 Saga, Y. *et al.* MesP1: a novel basic helix-loop-helix protein expressed in the  
554 nascent mesodermal cells during mouse gastrulation. *Development* **122**, 2769-  
555 2778 (1996).
- 556 45 Miniou, P. *et al.* Gene targeting restricted to mouse striated muscle lineage.  
557 *Nucleic Acids Res* **27**, e27, doi:10.1093/nar/27.19.e27 (1999).
- 558 46 Goldmann, W. H. & Ingber, D. E. Intact vinculin protein is required for control  
559 of cell shape, cell mechanics, and rac-dependent lamellipodia formation.  
560 *Biochem Biophys Res Commun* **290**, 749-755, doi:10.1006/bbrc.2001.6243  
561 (2002).
- 562 47 Bray, M. A., Sheehy, S. P. & Parker, K. K. Sarcomere alignment is regulated by  
563 myocyte shape. *Cell Motil Cytoskeleton* **65**, 641-651, doi:10.1002/cm.20290  
564 (2008).
- 565 48 Anraku, Y. Bacterial electron transport chains. *Annu Rev Biochem* **57**, 101-132,  
566 doi:10.1146/annurev.bi.57.070188.000533 (1988).
- 567 49 Corces, M. R. *et al.* An improved ATAC-seq protocol reduces background and  
568 enables interrogation of frozen tissues. *Nat Methods* **14**, 959-962,  
569 doi:10.1038/nmeth.4396 (2017).
- 570 50 John, S. *et al.* Chromatin accessibility pre-determines glucocorticoid receptor  
571 binding patterns. *Nat Genet* **43**, 264-268, doi:10.1038/ng.759 (2011).
- 572 51 Uosaki, H. *et al.* Transcriptional Landscape of Cardiomyocyte Maturation. *Cell*

- 573 *Rep* **13**, 1705-1716, doi:10.1016/j.celrep.2015.10.032 (2015).
- 574 52 Bentsen, M. *et al.* ATAC-seq footprinting unravels kinetics of transcription  
575 factor binding during zygotic genome activation. *Nat Commun* **11**, 4267,  
576 doi:10.1038/s41467-020-18035-1 (2020).
- 577 53 Iwafuchi-Doi, M. & Zaret, K. S. Pioneer transcription factors in cell  
578 reprogramming. *Genes Dev* **28**, 2679-2692, doi:10.1101/gad.253443.114  
579 (2014).
- 580 54 Sharma, A. *et al.* GATA6 mutations in hiPSCs inform mechanisms for  
581 maldevelopment of the heart, pancreas, and diaphragm. *Elife* **9**,  
582 doi:10.7554/eLife.53278 (2020).
- 583 55 Tremblay, M., Sanchez-Ferras, O. & Bouchard, M. GATA transcription factors  
584 in development and disease. *Development* **145**, doi:10.1242/dev.164384 (2018).
- 585 56 Liu, L. *et al.* An integrated chromatin accessibility and transcriptome landscape  
586 of human pre-implantation embryos. *Nat Commun* **10**, 364,  
587 doi:10.1038/s41467-018-08244-0 (2019).
- 588 57 Thomas, S. *et al.* Dynamic reprogramming of chromatin accessibility during  
589 *Drosophila* embryo development. *Genome Biol* **12**, R43, doi:10.1186/gb-2011-  
590 12-5-r43 (2011).
- 591 58 Janes, J. *et al.* Chromatin accessibility dynamics across *C. elegans* development  
592 and ageing. *Elife* **7**, doi:10.7554/eLife.37344 (2018).
- 593 59 Li, D., Shu, X., Zhu, P. & Pei, D. Chromatin accessibility dynamics during cell  
594 fate reprogramming. *EMBO Rep* **22**, e51644, doi:10.15252/embr.202051644  
595 (2021).
- 596 60 Iurlaro, M. *et al.* Mammalian SWI/SNF continuously restores local accessibility  
597 to chromatin. *Nat Genet* **53**, 279-287, doi:10.1038/s41588-020-00768-w (2021).
- 598 61 Schick, S. *et al.* Acute BAF perturbation causes immediate changes in  
599 chromatin accessibility. *Nat Genet* **53**, 269-278, doi:10.1038/s41588-021-  
600 00777-3 (2021).
- 601 62 Klemm, S. L., Shipony, Z. & Greenleaf, W. J. Chromatin accessibility and the  
602 regulatory epigenome. *Nat Rev Genet* **20**, 207-220, doi:10.1038/s41576-018-  
603 0089-8 (2019).
- 604 63 Allis, C. D. & Jenuwein, T. The molecular hallmarks of epigenetic control. *Nat*  
605 *Rev Genet* **17**, 487-500, doi:10.1038/nrg.2016.59 (2016).
- 606 64 Ernst, J. *et al.* Mapping and analysis of chromatin state dynamics in nine human  
607 cell types. *Nature* **473**, 43-49, doi:10.1038/nature09906 (2011).
- 608 65 Scuderi, G. J. & Butcher, J. Naturally Engineered Maturation of  
609 Cardiomyocytes. *Front Cell Dev Biol* **5**, 50, doi:10.3389/fcell.2017.00050  
610 (2017).

- 611 66 Hu, D. *et al.* Metabolic Maturation of Human Pluripotent Stem Cell-Derived  
612 Cardiomyocytes by Inhibition of HIF1alpha and LDHA. *Circ Res* **123**, 1066-  
613 1079, doi:10.1161/CIRCRESAHA.118.313249 (2018).
- 614 67 Gentillon, C. *et al.* Targeting HIF-1alpha in combination with PPARalpha  
615 activation and postnatal factors promotes the metabolic maturation of human  
616 induced pluripotent stem cell-derived cardiomyocytes. *J Mol Cell Cardiol* **132**,  
617 120-135, doi:10.1016/j.yjmcc.2019.05.003 (2019).
- 618 68 Pinto, A. R. *et al.* Revisiting Cardiac Cellular Composition. *Circ Res* **118**, 400-  
619 409, doi:10.1161/CIRCRESAHA.115.307778 (2016).
- 620 69 Ieda, M. *et al.* Cardiac fibroblasts regulate myocardial proliferation through  
621 beta1 integrin signaling. *Dev Cell* **16**, 233-244,  
622 doi:10.1016/j.devcel.2008.12.007 (2009).
- 623 70 Brutsaert, D. L. Cardiac endothelial-myocardial signaling: its role in cardiac  
624 growth, contractile performance, and rhythmicity. *Physiol Rev* **83**, 59-115,  
625 doi:10.1152/physrev.00017.2002 (2003).
- 626 71 Liu, R. *et al.* Tead1 is required for perinatal cardiomyocyte proliferation. *PLoS*  
627 *One* **14**, e0212017, doi:10.1371/journal.pone.0212017 (2019).
- 628 72 Pikkarainen, S. *et al.* GATA-4 is a nuclear mediator of mechanical stretch-  
629 activated hypertrophic program. *J Biol Chem* **278**, 23807-23816,  
630 doi:10.1074/jbc.M302719200 (2003).
- 631 73 Xiang, F. L., Guo, M. & Yutzey, K. E. Overexpression of Tbx20 in Adult  
632 Cardiomyocytes Promotes Proliferation and Improves Cardiac Function After  
633 Myocardial Infarction. *Circulation* **133**, 1081-1092,  
634 doi:10.1161/CIRCULATIONAHA.115.019357 (2016).
- 635 74 Wang, J., Liu, S., Heallen, T. & Martin, J. F. The Hippo pathway in the heart:  
636 pivotal roles in development, disease, and regeneration. *Nat Rev Cardiol* **15**,  
637 672-684, doi:10.1038/s41569-018-0063-3 (2018).
- 638 75 Kolodziejczyk, S. M. *et al.* MEF2 is upregulated during cardiac hypertrophy  
639 and is required for normal post-natal growth of the myocardium. *Curr Biol* **9**,  
640 1203-1206, doi:10.1016/S0960-9822(00)80027-5 (1999).
- 641 76 Ferdous, A. *et al.* FoxO1-Dio2 signaling axis governs cardiomyocyte thyroid  
642 hormone metabolism and hypertrophic growth. *Nat Commun* **11**, 2551,  
643 doi:10.1038/s41467-020-16345-y (2020).
- 644 77 Martin, O. J. *et al.* A role for peroxisome proliferator-activated receptor gamma  
645 coactivator-1 in the control of mitochondrial dynamics during postnatal cardiac  
646 growth. *Circ Res* **114**, 626-636, doi:10.1161/CIRCRESAHA.114.302562  
647 (2014).

648 **Figure legends**

649 **Figure 1. Comparative analysis of time-series transcriptomes from mouse hearts.**

650 Schematic of sample collection strategy from control and *cKO* mice for RNA-seq and  
651 time-ordered gene co-expression network (TO-GCN) analysis. **(B)** PCA plot of RNA-  
652 seq results. n=2 per group. **(C)** The TO-GCN structure with TF genes as nodes (blue  
653 circles) and the heatmap of average normalized RPKMs (z scores) at each time-point;  
654 TF genes were evaluated at nine levels in the control heart. Examples of TFs gene  
655 lists from each level in the control mice heart are shown. TFs shown at L1 and L2  
656 were developmental cardiac associated, e.g., *Gata4*, *Nkx2.5*, *Tbx5*, *Tbx20* and *Tead1*,  
657 in line with their known contributions to neonatal cell proliferation and maturation<sup>71-73</sup>  
658 (Supplementary file 1). The YAP co-factors (*Smad3*, *Runx1*, *Smad4/5*) shown at L3  
659 and L4 (P7), consistent with their roles in the cardiac homeostasis and cell cycle  
660 control at postnatal stages<sup>74</sup>. The postnatal activation of *Mef2* family (shown at L5  
661 and L7) is required for normal postnatal growth of the myocardium<sup>75</sup>, and *Foxo1*  
662 (shown at L6) is necessary for hypertrophic growth<sup>76</sup>. The PPARs shown at L8 is  
663 responsible for mitochondria biogenesis and metabolic switching of CMs<sup>77</sup>. **(D)**  
664 KEGG analysis for co-expressed genes in the control heart are displayed in order (by  
665 TO-GCN level); the same list from *cKO* heart is shown for comparison.

666

667 **Figure 2 Depletion of RNF20 before and after chamber formation leads to**  
668 **different outcomes.**

669 **(A)** Experimental design for the generation and identification of heart-specific *Rnf20*  
670 conditional knockout mice at different developmental stages. Protein extracts were  
671 collected from the heart tube of *Rnf20<sup>lox/flox</sup>;Mesp1-Cre* embryos (E10.5) and whole  
672 heart samples from *Rnf20<sup>lox/flox</sup>;Mck-Cre* mice (P35); immunoblot analyses were  
673 performed **(B)** Growth curve and **(C)** Kaplan-Meier survival curves of *Rnf20 cKO*  
674 (*Rnf20<sup>lox/flox</sup>;Mck-Cre*) mice and control (*Rnf20<sup>lox/flox</sup>*, *Rnf20<sup>lox/+</sup>*, *Mck-Cre Rnf20<sup>lox/+</sup>*)  
675 littermates. **(D)** Hematoxylin/eosin-stained sagittal (left) and cross (right) sections of  
676 control (*Rnf20<sup>lox/flox</sup>*) and *Rnf20 cKO* hearts at P2, P14, P28 and P42. **(E)** (Left panel)  
677 Representative 2D and M-mode echocardiographic images of the *RNF20 cKO* and  
678 control hearts. (Right panel) Echocardiographic analysis in the control and *cKO* mice  
679 at different stages. Left ventricular ejection fraction (EF) and fractional shortening (FS)  
680 are shown. Data are presented as mean ± SD; n=6 per group. \* p<0.05; \*\* p<0.01; \*\*\*  
681 p<0.001. **(F)** Representative telemetric electrocardiogram (ECG) patterns of control  
682 and *cKO* mice at P14. Quantification of the ECG changes in *Rnf20 cKO* and control  
683 mice from P14 to P42 are shown; data are presented as mean ± SD. n=5 per group. \*  
684 p<0.05; \*\* p<0.01; \*\*\* p<0.001.

685

686 **Figure 3. Postnatal maturation defects in *Rnf20* cKO mice heart.**

687 (A) Model of the dynamic formation of intercalated discs (IDs; composed of  
688 desmosome, gap junction and adherens junction) during cardiomyocyte maturation. (B)  
689 Confocal micrographs of cross sections of the cardiac muscle of control and cKO mice  
690 at P2, P21 and P35. Specific antibodies were used to identify the distributions of ID  
691 component, N-Cadherin, and the costamere marker, Vinculin. The nucleus was  
692 visualized by Hoechst 33342 staining; n=3 per group. Scale bar: 10  $\mu$ m. (C)  
693 Transmission electron microscopy images (TEMs) of ventricular myocardium from  
694 *Rnf20* cKO and control mice at P21 and P35. The inset provides a simple representation  
695 of ID morphologies in control and cKO mice. Abnormal structures were observed in  
696 mutant hearts, with widened gaps in the IDs. White arrowheads: adherent junctions;  
697 yellow arrowheads: desmosomes. Scale bar: 0.5  $\mu$ m. (D) Model of the morphological  
698 changes in immature cardiomyocytes; increased size and altered organization of the  
699 contractile cytoskeleton. (E) Staining for Vinculin (costamere marker) in ventricular  
700 sections from *Rnf20* cKO and control mice at P2, P21 and P35. Scale bar: 50  $\mu$ m. (F)  
701 The ultrastructure of the sarcomere in cardiomyocytes of control and *Rnf20* cKO mice.  
702 Abnormal Z-line (white arrowheads) and loose, distorted myofibrils (yellow  
703 arrowheads) were observed in cKO mice at P21 and P35. Scale bar: 0.5  $\mu$ m. (G)  
704 Schematic depicts the maturation of mitochondria during CM maturation. (H) TEMs of  
705 mitochondria in ventricular cardiomyocytes (Scale bar: 0.5  $\mu$ m). Quantification of  
706 number of cristae per  $\mu$ m suggested a significantly less dense cristae structure in cKO  
707 mice heart than in control at P35 (n = 3 for each group). \* p<0.05; \*\* p< 0.01; \*\*\* p<  
708 0.001. (I) Immunoblotting for mitochondria proteins in control and *Rnf20* cKO hearts  
709 (n=3). COX IV: cytochrome c oxidase IV; VDAC: voltage-dependent anion channel;  
710 PHB1: prohibitins; PDH: pyruvate dehydrogenase; SDHA: succinate dehydrogenase A;  
711 HSP60: heat shock protein 60. (J-L) The mitochondrial enzyme activities for (J)  
712 cytochrome c oxidase, (K) NADH oxidase and (L) ATP production were measured in  
713 P35 hearts (n = 3 for each, normalized to mitochondrial protein). \* p<0.05; \*\* p< 0.01;  
714 \*\*\* p< 0.001.

715

716 **Figure 4. Chromatin accessibility landscape in postnatal heart.**

717 (A) Experimental design for sample collection from control and cKO mice. (B) Peak  
718 calls from the P7 and P21 control or mutant hearts are shown individually. Color  
719 indicates the type of genomic region overlapped by the peak. UTR, untranslated region.  
720 (C) Immunoblot analysis of RNF20 in control heart. (D) Venn diagram of peak-  
721 associated genes in the control and *Rnf20* cKO heart at P7 (Left) and P21 (Right),  
722 respectively. Middle, model of peak associated genes from ATAC-seq (3 kb  $\pm$   
723 transcription start site). (E) Schematic illustrates the dynamics of TF binding (blue),

724 Tn5 insertion (green), and the concept of footprint analysis using ATAC-seq data. **(F)**  
725 Pairwise comparisons of TF activities in control and *cKO* mice. The volcano plots show  
726 differential binding activity versus  $-\log_{10}$  p-value (both calculated by TOBIAS) for all  
727 investigated TF motifs; each dot represents one motif. The control-specific TFs  
728 (RNF20-dependent) are labeled in red, and the *cKO*-specific TFs (*cKO*-dependent) are  
729 labeled in blue. Gene ontology analyses of RNF20-dependent and *cKO*-dependent TFs  
730 are shown. **(G)** Illustration of RNF20-mediated chromatin remodeling in postnatal heart.  
731 At P7: RNF20 is upregulated, chromatin accessibility at regulatory elements (REs) of  
732 genes are upregulated, TF binding is upregulated; at P21: RNF20 is downregulated,  
733 chromatin accessibility at REs of genes are downregulated, TF binding is  
734 downregulated.

735

736 **Figure 5. Working model.**

737 **(A)** Schematic summarizes the effects of *Rnf20* inactivation (*cKO*) on mice heart  
738 development. **(B)** Dynamic RNF20 expression after birth mediates remodeling of  
739 chromatin accessibility to allow the induction of a time-ordered postnatal transcription  
740 program. RNF20 is highly expressed at the early postnatal stage, leading to a global  
741 chromatin decompaction that facilitates the binding of transcription factors (TFs) to  
742 early postnatal genes. RNF20 level decreases at the later stage of heart maturation,  
743 leading to chromatin compaction and a restriction of TF binding that establishes and  
744 maintains the mature status of the heart.

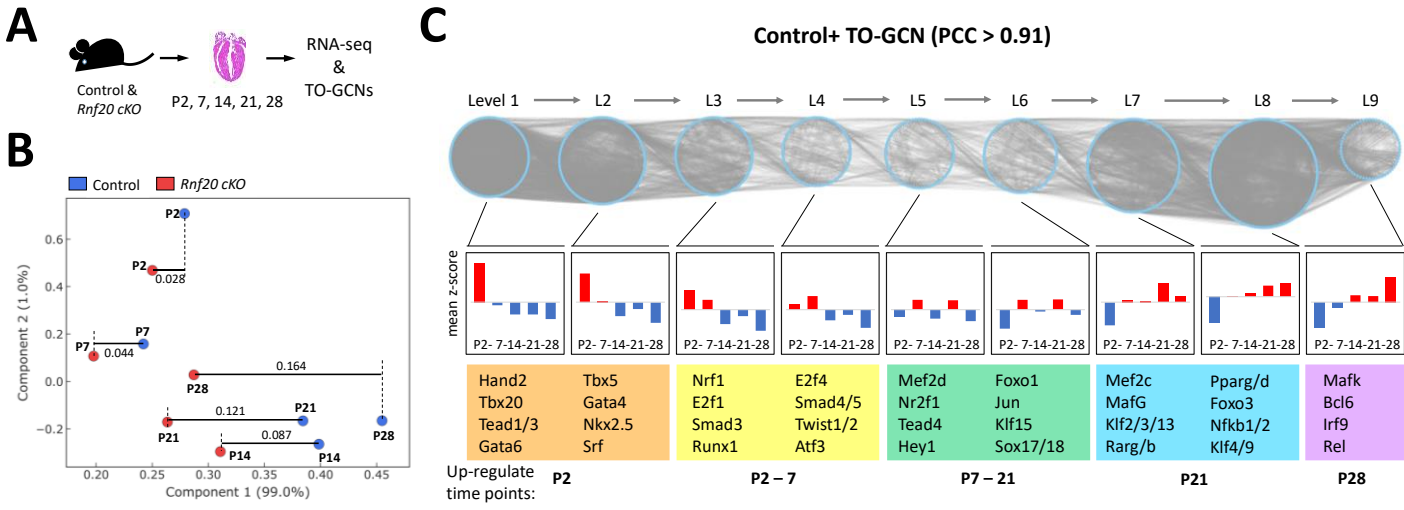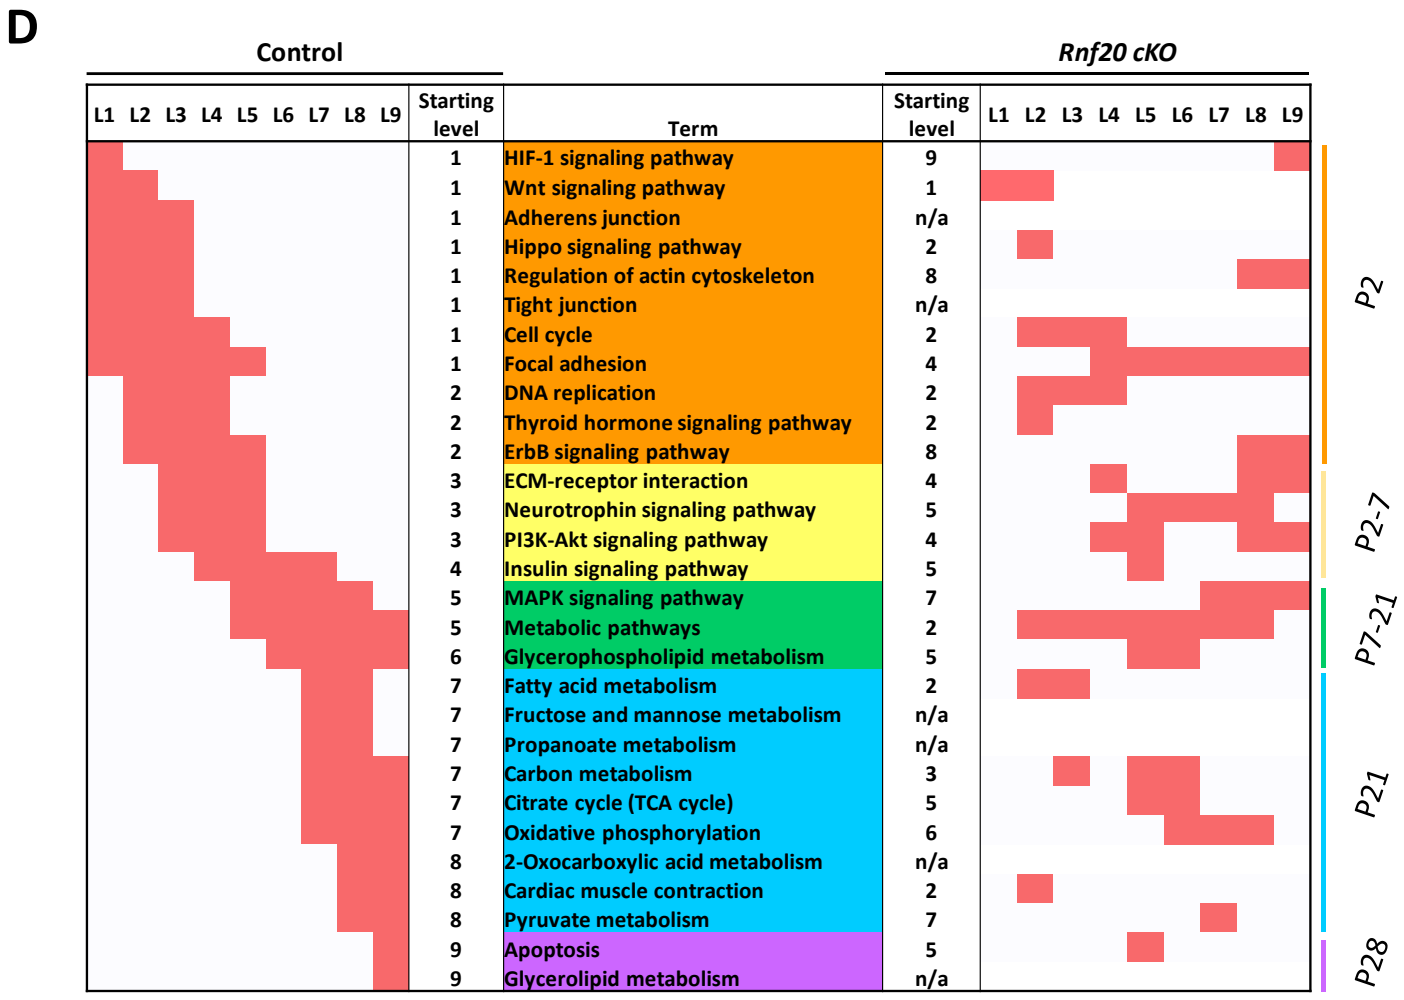

Figure 1

**A**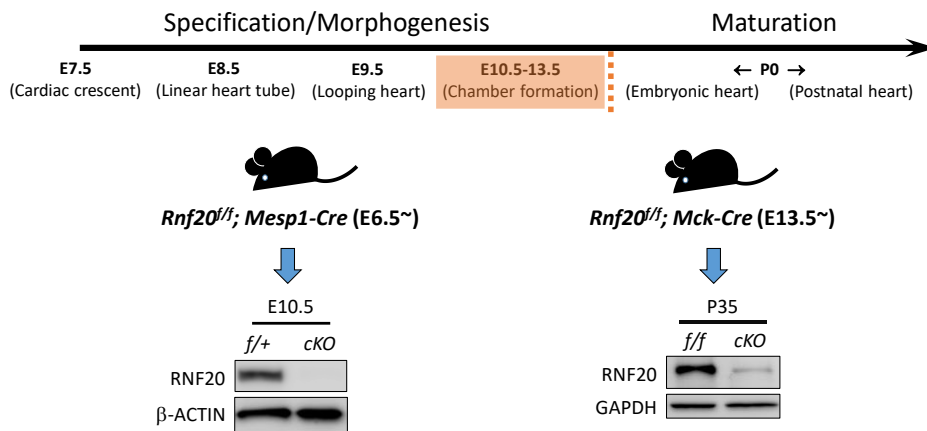**B***Rnf20<sup>f/f</sup>; Mck-Cre*

Growth curve

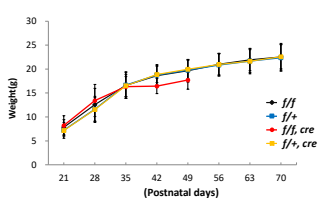**C**

Survival rate

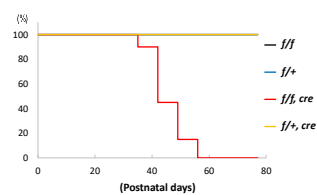**D**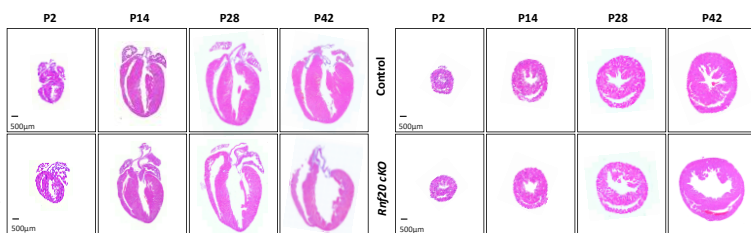**E**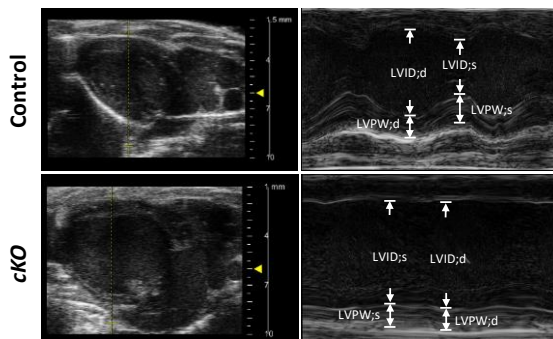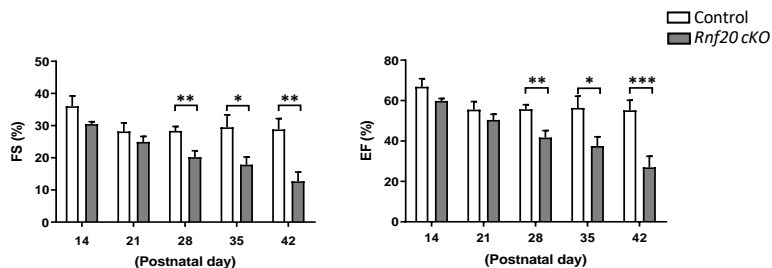**F**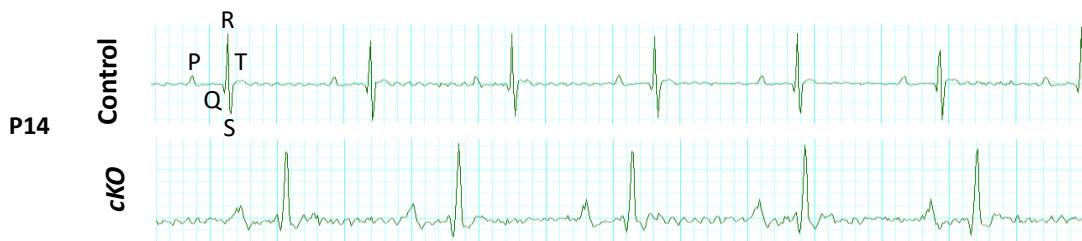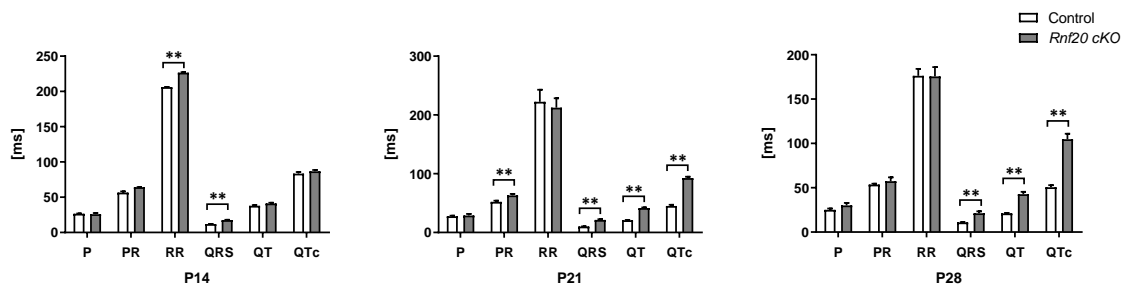**Figure 2**



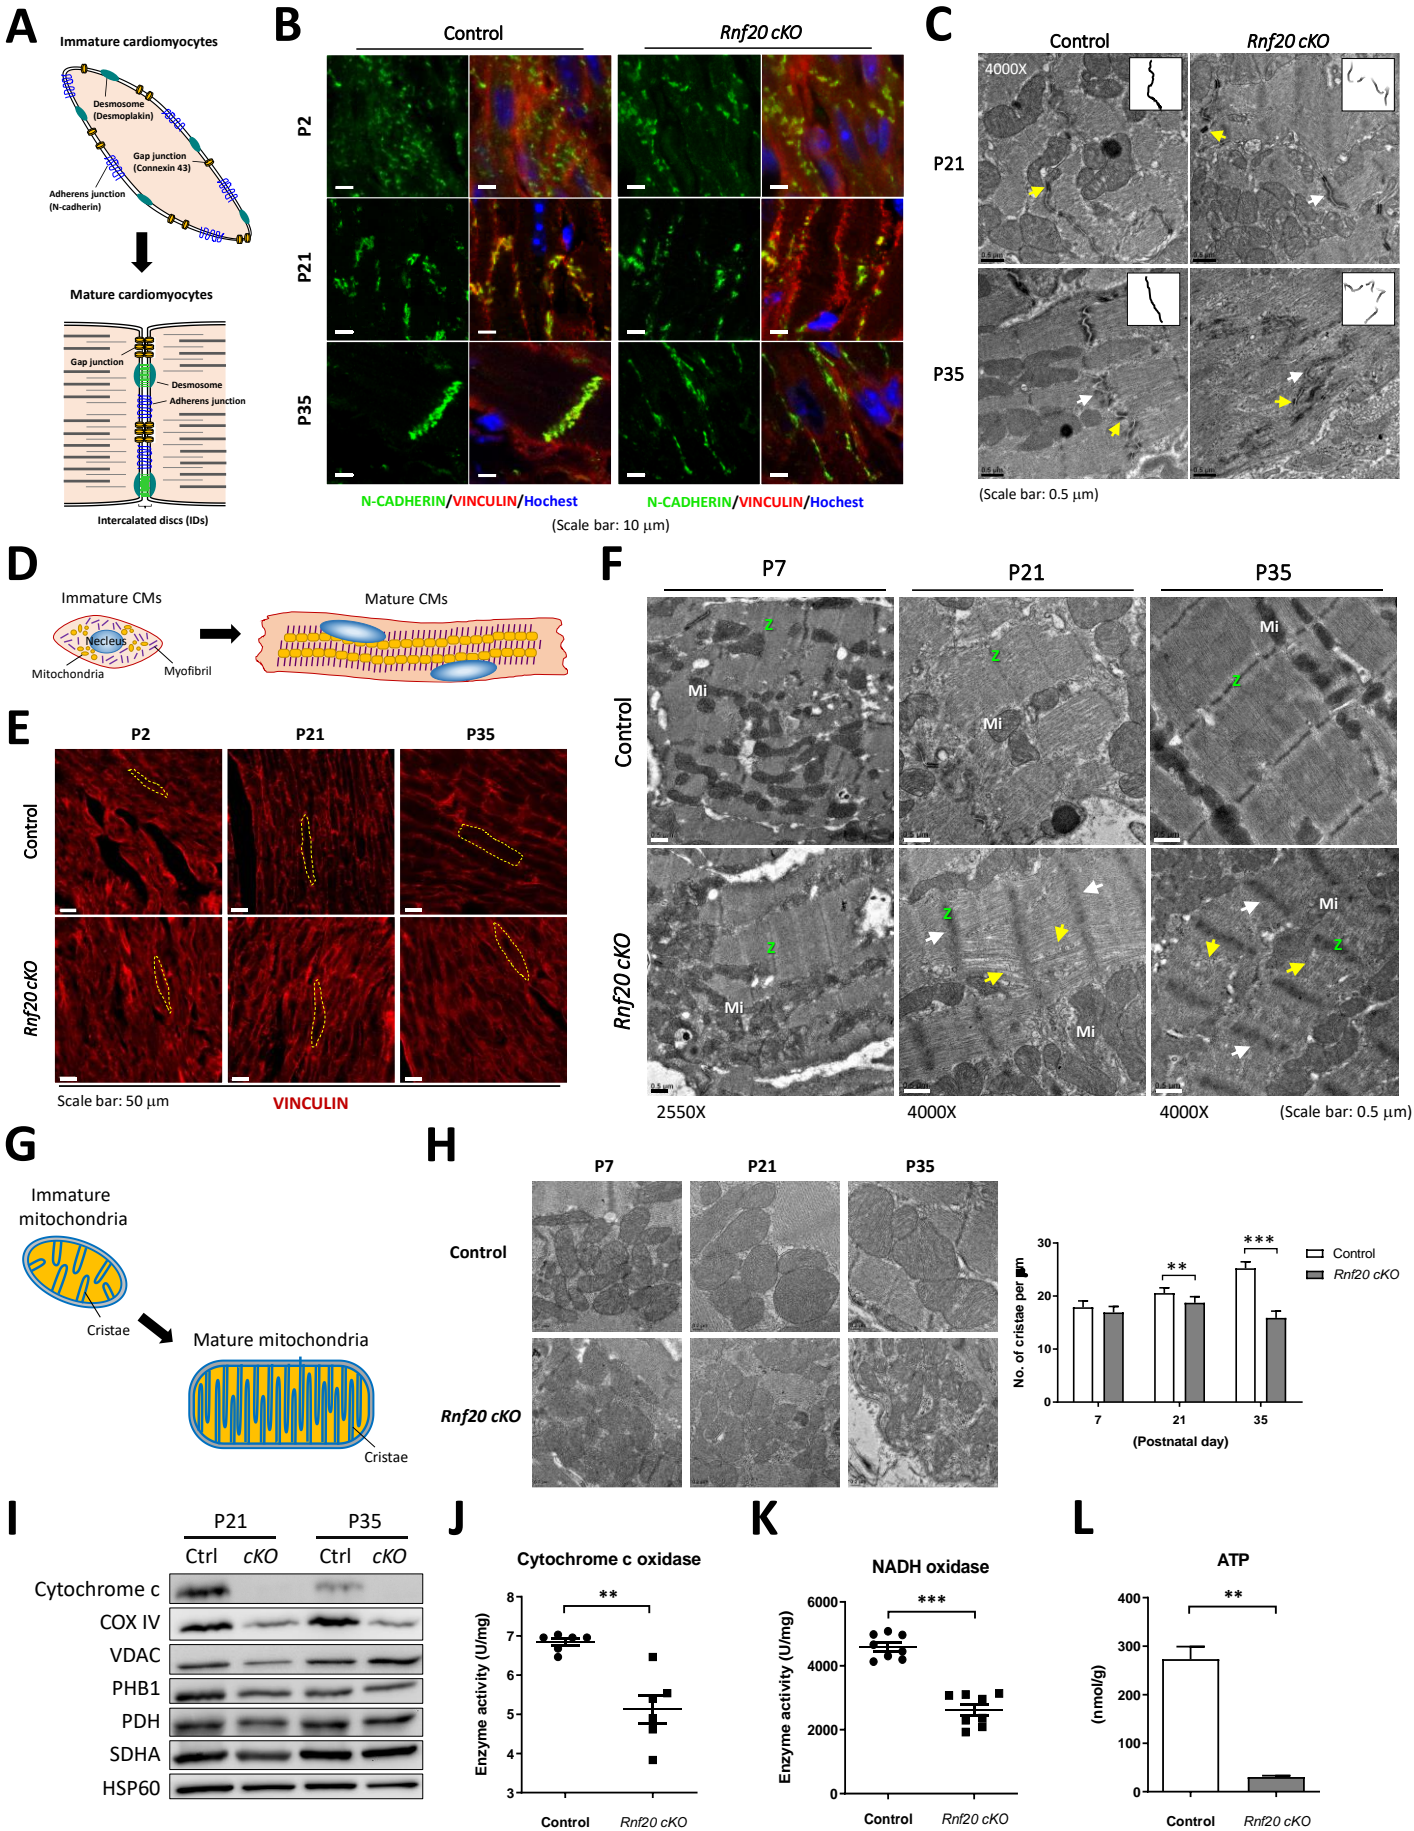

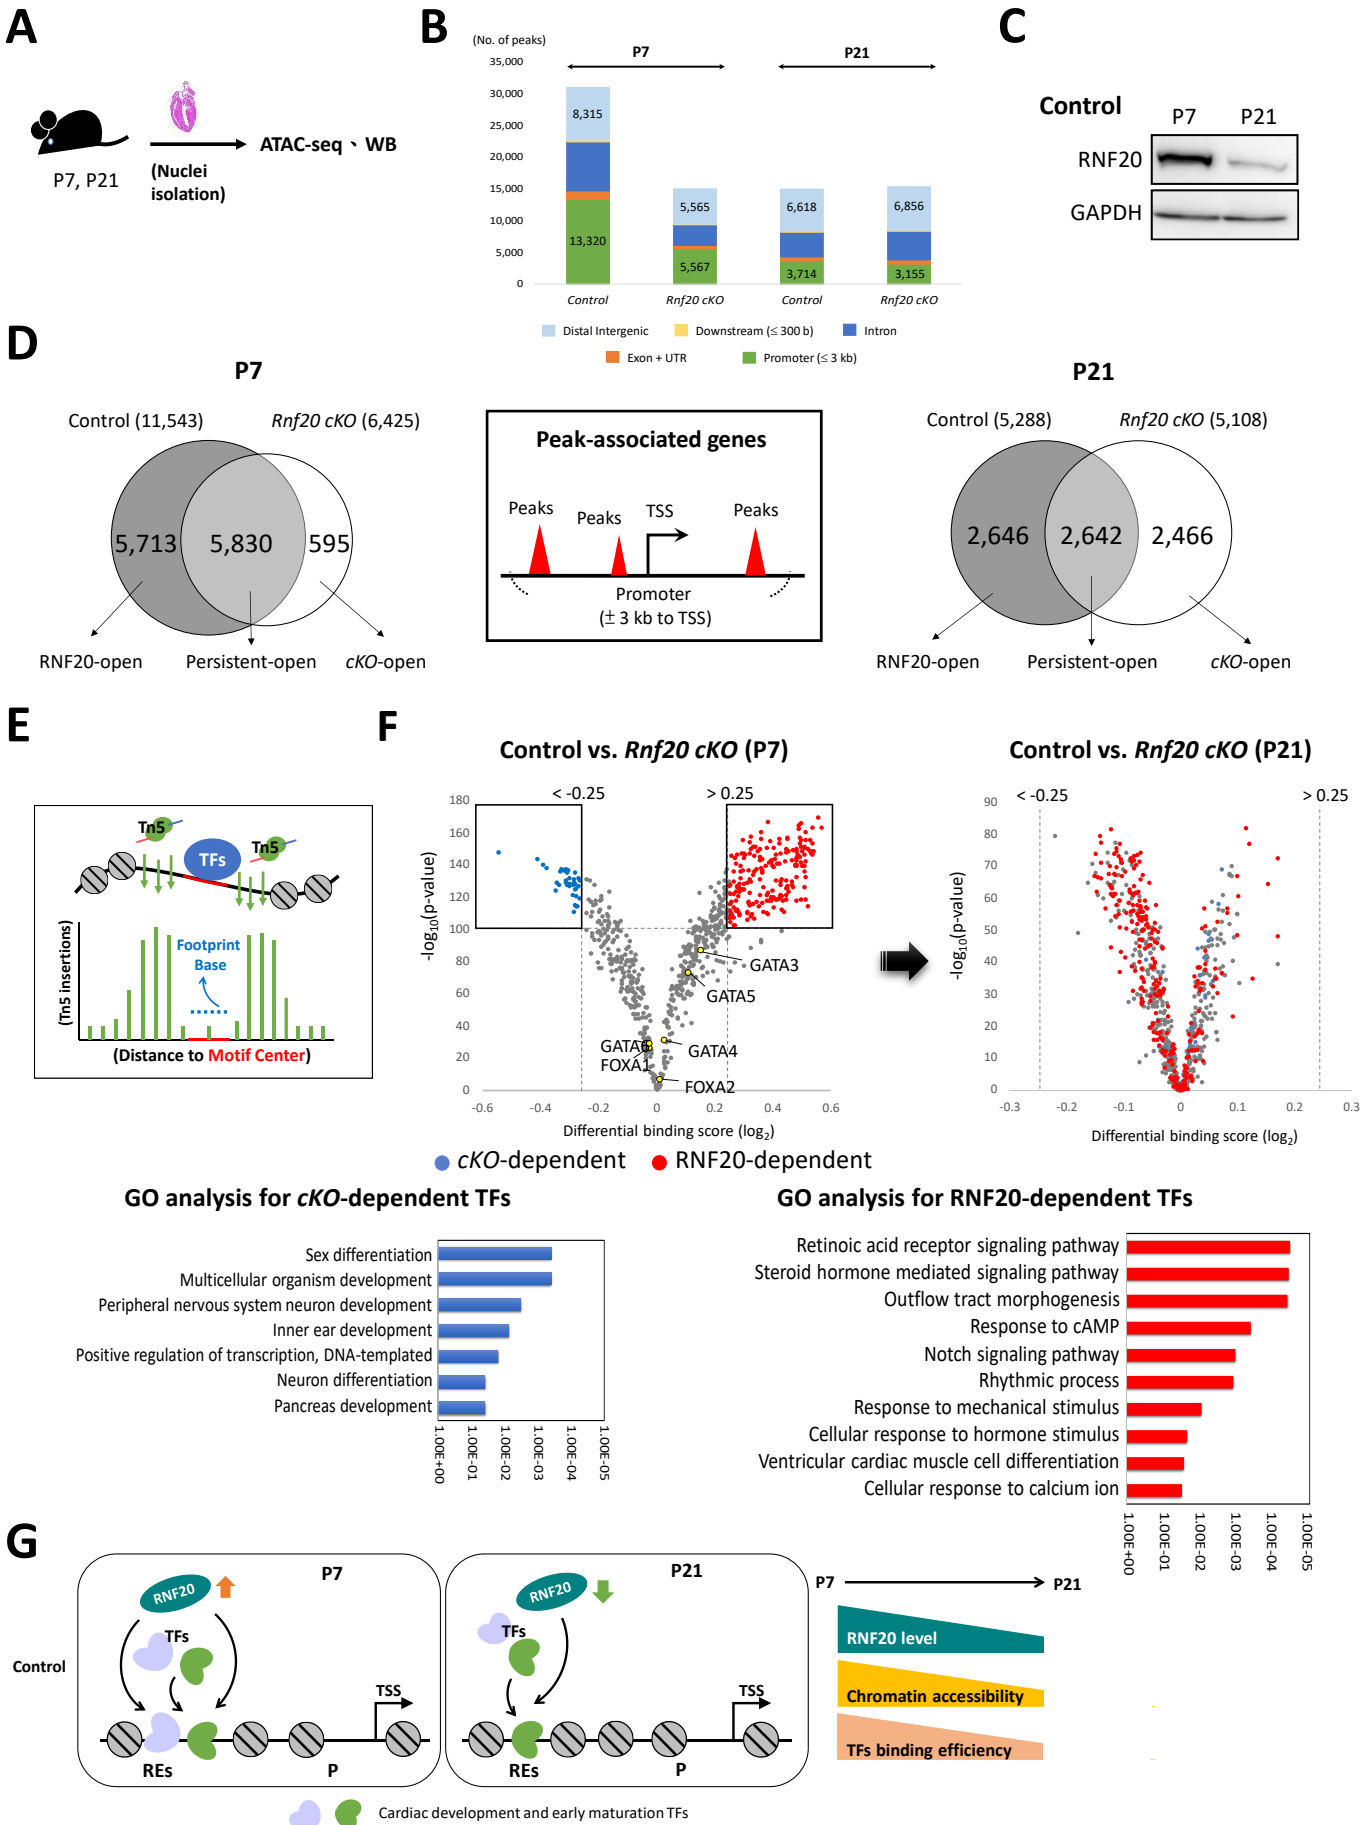

**Figure 4**

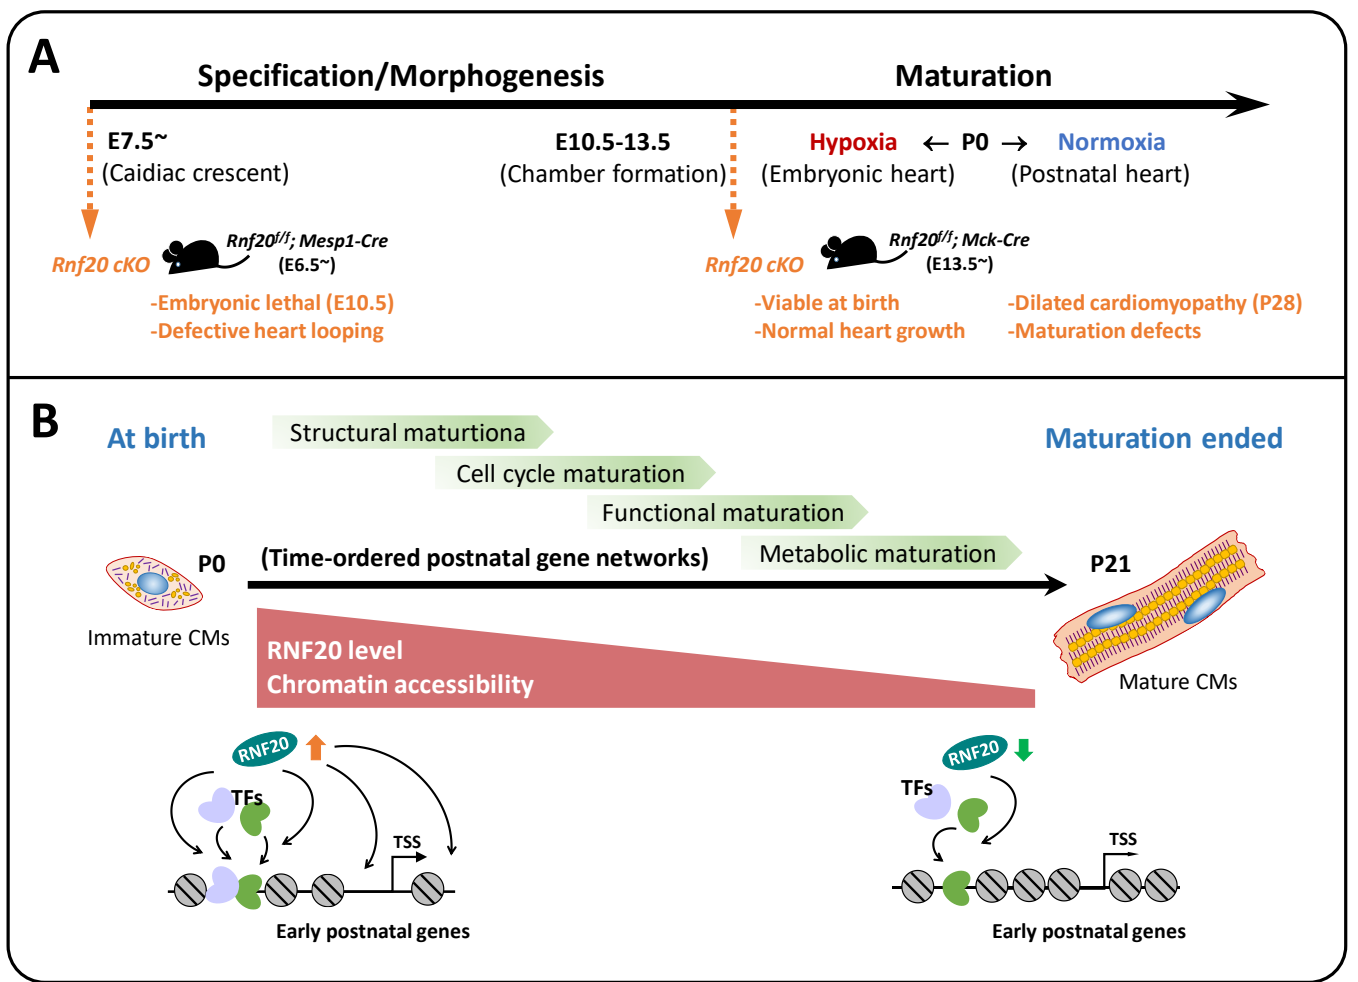

Figure 5
